# Supplementary material for: Genetic Variants Associated with Drug Resistance of Cytomegalovirus in Hematopoietic Cell Transplantation Recipients
Source: MDPI journal article supplement (doi:10.3390/v15061286), 2023-05-30
Supplement: s1 [file s1]

**Table S1.** Patients with resistance variants in CMV *UL97* and *UL54* genes

|                                                        | Patient #1       | Patient #2   | Patient #3       | Patient #4           | Patient #5       |
|--------------------------------------------------------|------------------|--------------|------------------|----------------------|------------------|
| Gender, age (years)                                    | F/50             | M/28         | F/13             | M/53                 | F/17             |
| Primary disease                                        | MDS              | ALL          | ALL              | AML                  | MDS              |
| HCT source                                             | Peripheral blood | Cord blood   | Peripheral blood | Cord blood           | Peripheral blood |
| Donor type                                             | Unrelated        | Unrelated    | Unrelated        | Unrelated            | Related          |
| HLA-matching                                           | Matched          | Matched      | Matched          | Matched              | Mismatched       |
| Letermovir prophylaxis                                 | No               | No           | No               | Yes                  | No               |
| CMV D/R serostatus                                     | D?/R+            | D?/R+        | D-/R+            | D?/R+                | D+/R+            |
| Initial antiviral regimen                              | Valganciclovir   | Ganciclovir  | Ganciclovir      | Ganciclovir          | Ganciclovir      |
| Period of development of refractory CMV DNAemia (days) | 65               | 68           | 44               | 124                  | 40               |
| Resistant variant in the <i>UL97</i> gene              | A594V            | M460I, A594V | L595F            | C603W                | L595W            |
| Resistant variant in the <i>UL54</i> gene              | A809V            | No           | No               | No                   | No               |
| Modification of initial antiviral regimen              | Yes              | Yes          | No               | Yes                  | No               |
| Secondary antiviral regimen                            | Foscarnet        | Foscarnet    | .                | Foscarnet            | .                |
| CMV clearance (days)                                   | Yes (239)        | Yes (256)    | Yes (168)        | Yes (142)            | Yes (133)        |
| Acute Graft vs. Host Disease                           | Moderate         | Moderate     | Severe           | Severe               | Moderate         |
| CMV organ disease                                      | Colitis          | Colitis      | Retinitis        | Colitis<br>Retinitis | Retinitis        |
| Peak CMV viral load (IU/ml)                            | 3,135,692        | 36,080       | 310,464          | 64,569               | 467,696          |
| Outcome                                                | Alive            | Dead         | Alive            | Dead                 | Dead             |

**Table S1.** Continued

|                                                        | Patient #6                           | Patient #7       | Patient #8                                          | Patient #9                        | Patient #10      |
|--------------------------------------------------------|--------------------------------------|------------------|-----------------------------------------------------|-----------------------------------|------------------|
| Gender, age (years)                                    | M/23                                 | F/64             | M/59                                                | F/67                              | F/5              |
| Primary disease                                        | NHL                                  | ALL              | AML                                                 | AML                               | HLH              |
| HCT source                                             | Peripheral blood                     | Peripheral blood | Peripheral blood                                    | Peripheral blood                  | Peripheral blood |
| Donor type                                             | Related                              | Unrelated        | Related                                             | Related                           | Unrelated        |
| HLA-matching                                           | Mismatched                           | Matched          | Mismatched                                          | Mismatched                        | Matched          |
| Letermovir prophylaxis                                 | No                                   | No               | No                                                  | No                                | No               |
| CMV D/R serostatus                                     | D+/R+                                | D+/R+            | D-/R+                                               | D-/R+                             | D?/R+            |
| Initial antiviral regimen                              | Ganciclovir                          | Ganciclovir      | Ganciclovir                                         | Ganciclovir                       | Ganciclovir      |
| Period of development of refractory CMV DNAemia (days) | 57                                   | 51               | 189                                                 | 266                               | 70               |
| Resistant variant in the <i>UL97</i> gene              | No                                   | No               | L595W                                               | A594V                             | L595W            |
| Resistant variant in the <i>UL54</i> gene              | A809V                                | F412L            | F412L, V787L                                        | No                                | No               |
| Modification of initial antiviral regimen              | Yes                                  | No               | Yes                                                 | Yes                               | Yes              |
| Secondary antiviral regimen                            | Foscarnet                            | .                | Foscarnet                                           | Foscarnet                         | Foscarnet        |
| CMV clearance (days)                                   | No                                   | No               | No                                                  | Yes (155)                         | Yes (125)        |
| Acute Graft vs. Host Disease                           | Severe                               | Severe           | Severe                                              | Moderate                          | No               |
| CMV organ disease                                      | Colitis<br>Retinitis<br>Encephalitis | No               | gastritis<br>colitis<br>encephalitis<br>pneumonitis | gastritis<br>colitis<br>retinitis | No               |
| Peak CMV viral load (IU/ml)                            | 865,252                              | 386,720          | 14,690,000                                          | 806,000                           | 1,079,000        |
| Outcome                                                | Dead                                 | Dead             | Dead                                                | Alive                             | Alive            |

MDS, myelodysplastic syndrome; ALL, acute lymphoblastic leukemia; AML, acute myeloid leukemia; NHL, non-Hodgkin lymphoma; HLH, Hemophagocytic lymphohistiocytosis; HCT, hematopoietic cell transplantation; HLA, human leukocyte antigen; CMV, cytomegalovirus; D+, donor seropositive; D-, donor seronegative; D?, donor serostatus unknown; R+, recipient seropositive.
